# Supplementary material for: Galvanic synthesis of AgPd bimetallic catalysts from Ag clusters dispersed in a silica matrix
Source: Royal Society of Chemistry journal article supplement (doi:10.1039/d0cy01675f), 2020-01-01
Supplement: d0cy01675f1.pdf [file d0cy01675f1.pdf]

## Galvanic Synthesis of AgPd Bimetallic Catalysts from Ag Clusters Dispersed in a Silica Matrix

V. Sudheeshkumar,<sup>a</sup> Maryam Alyari,<sup>a</sup> Mahesh Gangishetty,<sup>b</sup> and Robert W. J. Scott<sup>\*</sup>

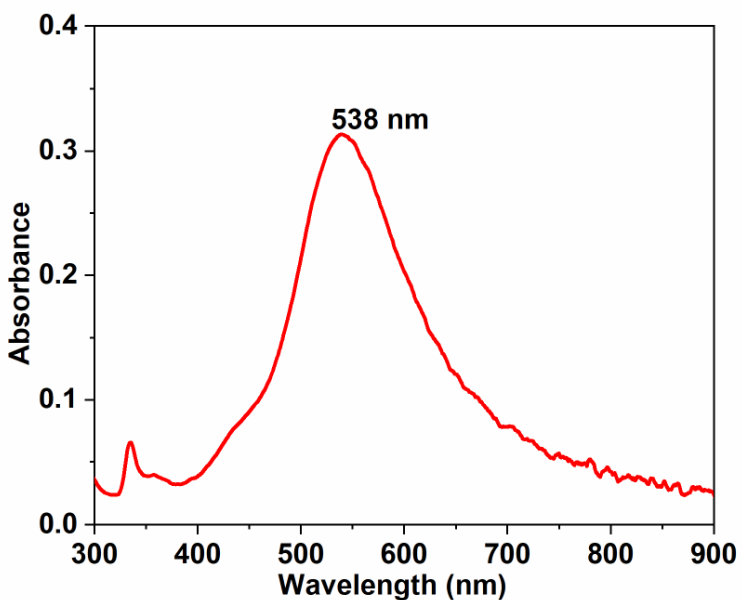

Figure S1. UV-Vis spectra of Ag Nanotriangles.

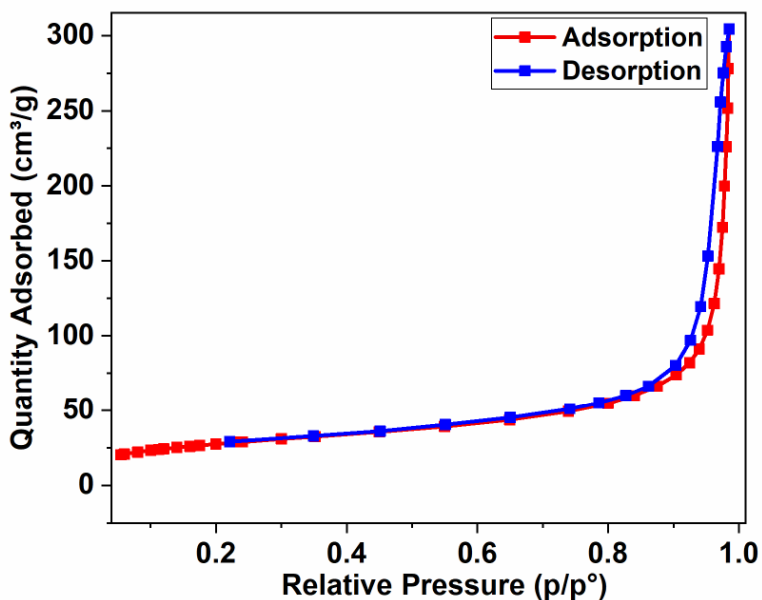

Figure S2. BET surface area of Ag@SiO<sub>2</sub> materials after calcination at 650 °C.

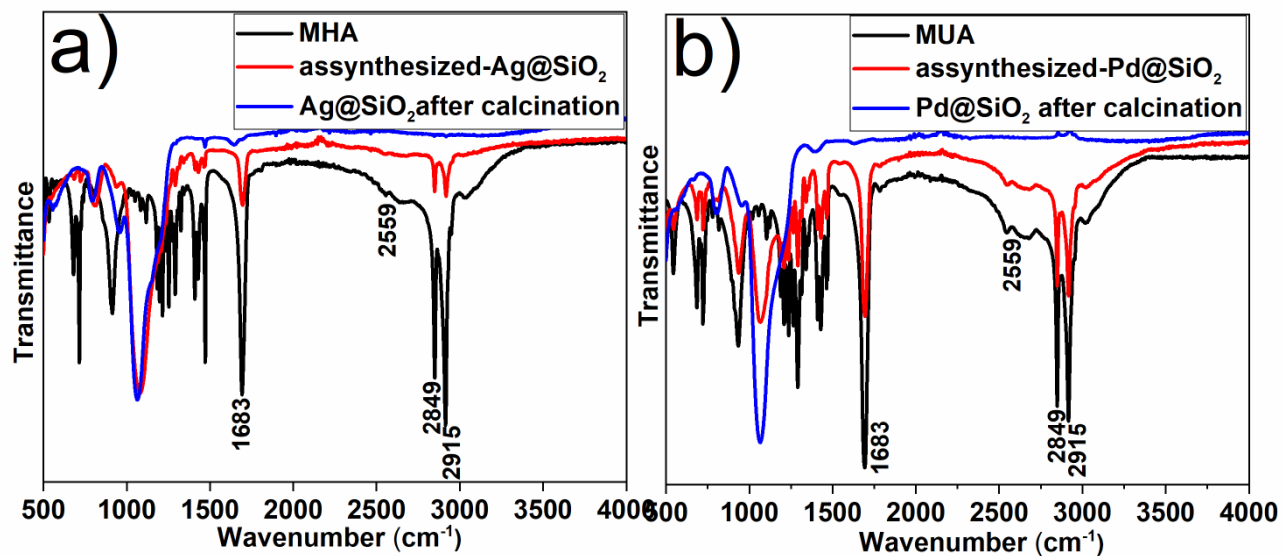

**Figure S3.** FTIR spectra of a) Ag@SiO<sub>2</sub> before and after calcination and b) Pd@SiO<sub>2</sub> before and after calcination.

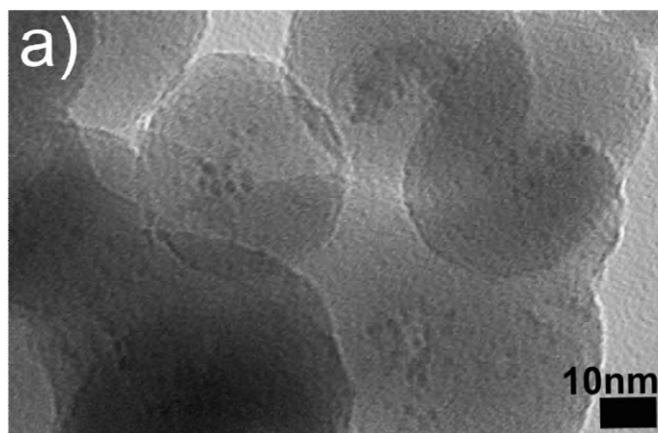

**Figure S4.** TEM image of Pd@SiO<sub>2</sub> catalysts after calcination.

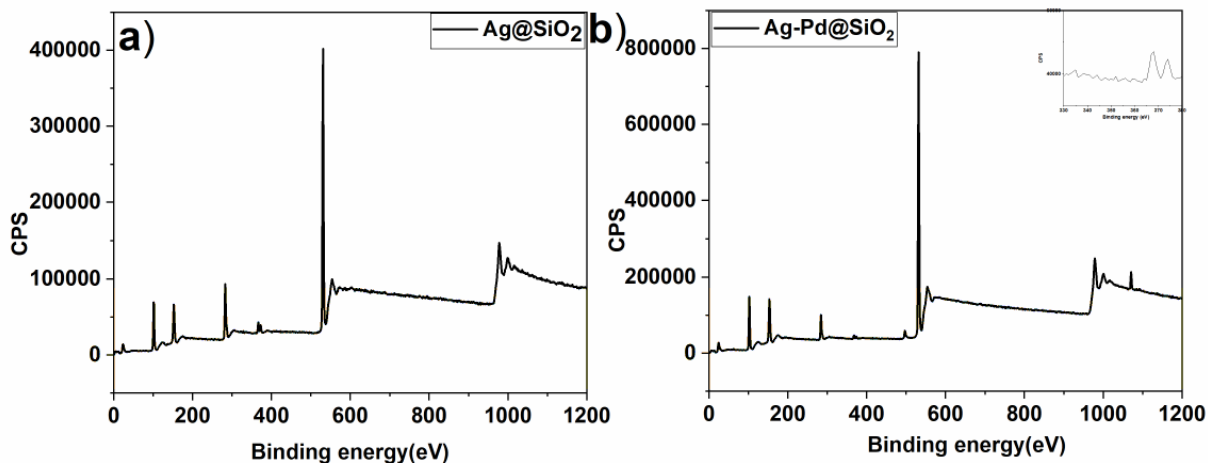

**Figure S5.** XPS survey scan measurement of Ag@SiO<sub>2</sub> and AgPd@SiO<sub>2</sub>

**Table S1.** Elemental composition of Ag@SiO<sub>2</sub> and AgPd@SiO<sub>2</sub> catalysts using XPS analysis

| Element | Ag@SiO <sub>2</sub> (At %) | Ag-Pd@SiO <sub>2</sub> (At %) |
|---------|----------------------------|-------------------------------|
| Ag 3d   | 0.5                        | 0.1                           |
| Pd 3d   | 0.0                        | 0.0                           |
| C 1s    | 26.6                       | 14.1                          |
| Si 2p   | 25.4                       | 32.0                          |
| O 1s    | 47.5                       | 53.8                          |

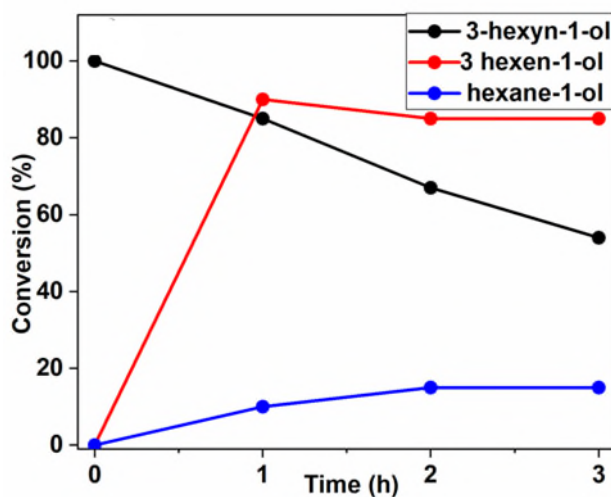

**Figure S6.** Time dependant hydrogenation of 3-hexyne-1-ol hydrogenation reaction AgPd@SiO<sub>2</sub> catalysts.

**Table S2.** The catalytic activity for 3-hexyne-1-ol hydrogenation reaction over AgPd@SiO<sub>2</sub> catalysts.

| Catalysts                   | Conversion % | Selectivity % |            |
|-----------------------------|--------------|---------------|------------|
|                             |              | 3 hexen-1-ol  | hexan-1-ol |
| <b>1<sup>st</sup> cycle</b> | 48           | 85            | 15         |
| <b>2<sup>nd</sup> cycle</b> | 45           | 89            | 11         |
| <b>3<sup>rd</sup> cycle</b> | 47           | 86            | 14         |
| <b>4<sup>th</sup> cycle</b> | 46           | 81            | 19         |
